# Supplementary material for: Rhamnetin decelerates the elimination and enhances the antitumor effect of the molecular-targeting agent sorafenib in hepatocellular carcinoma cells via the miR-148a/PXR axis
Source: Royal Society of Chemistry journal article supplement (doi:10.1039/d0fo02270e), 2021-01-01
Supplement: d0fo02270e1.pdf [file d0fo02270e1.pdf]

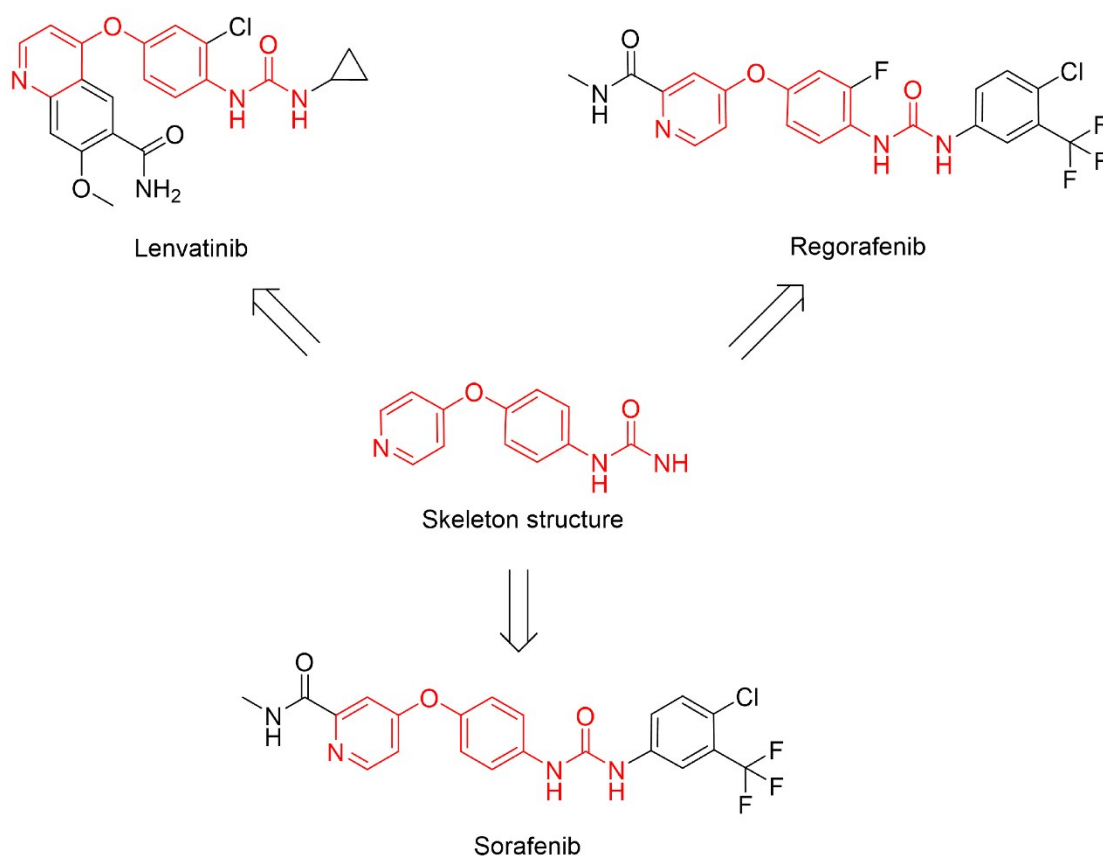

1

2

3 **Supplemental Fig. 1** The three compounds, Sorafenib, Regorafenib and Lenvatinib  
4 have similar chemical structure-feature. The agents are built based on the same skeleton  
5 structure: 1-(4-(pyridin-4-yloxy) phenyl)urea.

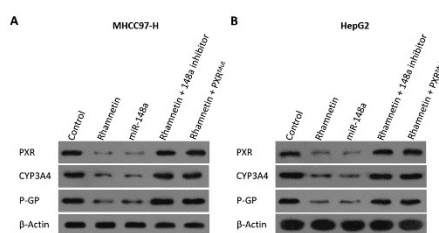

6

7 **Supplemental Fig. 2** Rhamnetin repressing the activation of PXR pathway via miR-  
8 148a/PXR axis. The HCC cells, MHCC97-H (A) or HepG2 (B) was transfected with  
9 control, miR-148a, inhibitor of miR-148a or PXRmut, was treated with control or  
10 rhamnetin. The expression of PXR, CYP3A4 or P-GP was examined by using their  
11 antibodies. The  $\beta$ -Actin was chosen as the loading control.
